# Supplementary material for: Genomic characteristics of an avipoxvirus 282E4 strain
Source: PubMed Central journal article supplement — Virus Res. 2023 Sep 13;336:199218. doi: 10.1016/j.virusres.2023.199218 (PMC10507152; doi:10.1016/j.virusres.2023.199218), 2023-09-13
Supplement: mmc1.pdf [file mmc1.pdf]

Table S2. Details of Avipoxvirus used in this study

| Virus name          | Strain                  | Origin            | Length/bp  | Accession no. |
|---------------------|-------------------------|-------------------|------------|---------------|
| Fowlpox virus       | 282E4                   | China             | 308827     | MG702259.1    |
|                     | Usda standard challenge | USA               | 288539     | NC_002188.1   |
|                     | SD15-670.2              | USA               | 295938     | MH734528.1    |
|                     | MN00.1                  | USA               | 291057     | MH709125.1    |
|                     | SD15-670.1              | USA               | 288196     | MH719203.1    |
|                     | MN00.2                  | USA               | 298798     | MH709124.1    |
|                     | V_ja                    | Republic of Korea | 288501     | MW558081.1    |
|                     | V_ds                    | Republic of Korea | 278618     | MW558079.1    |
|                     | V_cmp                   | Republic of Korea | 287251     | MW558078.1    |
|                     | V_blen                  | Republic of Korea | 291194     | MW558077.1    |
|                     | V_kr                    | Republic of Korea | 292650     | MW558080.1    |
|                     | 19D064                  | Republic of Korea | 297250     | MW558072.1    |
|                     | 16069_trachea_170323    | France            | 288539     | MF766431.1    |
|                     | 16055_trachea_170512    | France            | 288539     | MF766430.1    |
|                     | W775-18                 | Australia         | 298250     | OK558609.1    |
|                     | FWPV-S                  | Australia         | 293578     | MW142017.1    |
|                     | NX10                    | China             | 282402     | KX196452.1    |
|                     |                         | USA               | 288539     | AF198100.1    |
|                     | V_poxine                | Republic of Korea | 295688     | MW558076.1    |
|                     | 2755                    | Republic of Korea | 297405     | MW558073.1    |
| 15D039              | Republic of Korea       | 297159            | MW558068.1 |               |
| Canarypox virus     | 16117_scab_170512       | France            | 288539     | MF766432.1    |
|                     |                         | USA               | 359853     | NC_005309.1   |
|                     | ATCC VR-111             | USA               | 359853     | AY318871.1    |
| Shearwaterpox virus | FMV15SnBuPox            | Canada            | 359853     | MG760432.1    |
|                     | SWPV-1                  | Australia         | 326929     | KX857216.1    |
| Pigeonpox virus     | SWPV-2                  | Australia         | 351108     | KX857215.1    |
|                     | FeP2                    | South Africa      | 282356     | NC_024447.1   |
| Penguinpox virus    | PSan92                  | USA               | 306862     | NC_024446.1   |
| Flamingopox virus   | YEP-NZ                  | Australia         | 349821     | MW296038.1    |
|                     | FGPVKD09                | South Africa      | 293123     | NC_036582.1   |
| Magpiepox virus     | 62-11-06-2000-ANU       | Australia         | 298392     | MW485973.1    |
|                     |                         | Australia         | 293226     | MK903864.1    |
| Albatrosspox virus  | TST/1997                | Australia         | 286155     | OK348853.1    |
|                     | SAN97-0665NZ            | Australia         | 351909     | MW365933.1    |
| Mudlarkpox virus    | AU2019                  | Australia         | 342723     | MT978051.1    |
| Turkeypox virus     | HU1124/2011             | USA               | 188534     | NC_028238.1   |
| Crowpox virus       | 122740AU/2021           | Australia         | 328768     | ON408417.1    |
| Cheloniid poxvirus  | AUS                     | Australia         | 343132     | MT799800.1    |

Table S3. Comparative analysis of representative avipoxviruses and ALPV2 based on complete genome nucleotide sequences.

| Avipoxvirus (abbreviation) | Accession number | Genome length (kbp) | A+T content (%) | Number of ORFs |
|----------------------------|------------------|---------------------|-----------------|----------------|
| FPV-282E4                  | MG702259.1       | 309                 | 72              | 313            |
| FPV-US                     | NC_002188.1      | 289                 | 69.1            | 260            |
| CNPV                       | AY318871.1       | 360                 | 69.6            | 328            |
| ChePV-1                    | MT799800.1       | 343                 | 71.6            | 329            |
| SWPV-1                     | KX857216.1       | 327                 | 72.4            | 310            |
| SWPV-2                     | KX857215.1       | 351                 | 69.8            | 312            |
| FGPV                       | NC_036582.1      | 293                 | 70.5            | 285            |
| MPPV                       | MK903864.1       | 293                 | 70.4            | 301            |
| MLPV                       | MT978051.1       | 343                 | 70.2            | 352            |
| PEPV                       | NC_024446.1      | 307                 | 70.5            | 285            |
| FeP2                       | NC_024447.1      | 282                 | 70.5            | 271            |
| TKPV                       | NC_028238.1      | 189                 | 70.2            | 171            |

Table S4. Number of ORFs in each of the 14 multigene families identified in the fully sequenced avian poxvirus genomes

|                                        | FPV-282E4 | FPV-US | CNPV | ChePV-1 | MLPV | SWPV-1 | FeP2 |
|----------------------------------------|-----------|--------|------|---------|------|--------|------|
| G protein-coupled receptor gene family | 4         | 3      | 4    | 4       | 4    | 4      | 2    |
| Interleukin 18 (IL-18)-binding protein | 1         | 1      | 3    | 0       | 3    | 3      | 1    |
| Ankyrin repeat proteins                | 54        | 31     | 51   | 53      | 47   | 51     | 47   |
| Ig-like domain protein                 | 6         | 6      | 9    | 8       | 7    | 9      | 1    |
| C-type Lectin                          | 11        | 9      | 11   | 11      | 13   | 13     | 5    |
| CC chemokine                           | 5         | 4      | 3    | 5       | 5    | 6      | 4    |
| C4L/C10L                               | 1         | 3      | 3    | 3       | 3    | 2      | 2    |
| HT Motif                               | 5         | 5      | 5    | 5       | 5    | 5      | 5    |
| N1R/p28                                | 17        | 10     | 26   | 24      | 25   | 20     | 11   |
| EFc family                             | 2         | 3      | 2    | 3       | 1    | 2      | 1    |
| $\beta$ -NGF                           | 2         | 2      | 2    | 2       | 2    | 2      | 1    |
| TGF- $\beta$                           | 9         | 1      | 5    | 5       | 6    | 4      | 1    |
| Serpin                                 | 5         | 4      | 5    | 5       | 5    | 5      | 4    |
| B22R                                   | 5         | 6      | 6    | 9       | 7    | 6      | 4    |
