# Supplementary material for: Genomic characteristics of an avipoxvirus 282E4 strain
Source: PubMed Central journal article supplement — Virus Res. 2023 Sep 13;336:199218. doi: 10.1016/j.virusres.2023.199218 (PMC10507152; doi:10.1016/j.virusres.2023.199218), 2023-09-13
Supplement: mmc2.pdf [file mmc2.pdf]

Table S1. ORFs of avipoxvirus 282E4

| ORF | Position<br>(length,<br>aa) <sup>1</sup> | Best matching <sup>2</sup> |                              |         | Predicated structure |                 |                              | FWPV <sup>7</sup> |      |                      | CNPV <sup>8</sup> |         |                   |
|-----|------------------------------------------|----------------------------|------------------------------|---------|----------------------|-----------------|------------------------------|-------------------|------|----------------------|-------------------|---------|-------------------|
|     |                                          | AN <sup>3</sup>            | BlastP<br>score <sup>4</sup> | Species | %<br>ID <sup>5</sup> | aa <sup>1</sup> | and/or function <sup>6</sup> | AN <sup>3</sup>   | ORF  | %<br>ID <sup>5</sup> | AN <sup>3</sup>   | ORF     | % ID <sup>5</sup> |
| 001 | 351:500<br>(49)                          |                            |                              |         |                      |                 |                              |                   |      |                      |                   |         |                   |
| 002 | 621:1121<br>(166)                        | NP_955025.1                | 109                          | CNPV    | 43                   | 171             | Uncharacterized protein      |                   |      |                      | Q6VZ20            | CNPV002 | 44                |
| 003 | 1265:1810<br>(181)                       | NP_955025.1                | 128                          | CNPV    | 47                   | 208             | C-type lectin-like protein   | Q9ICH6            | V001 | 25                   | Q6VZ21            | CNPV003 | 47                |
| 004 | 1953:2621<br>(222)                       | QRI42722.1                 | 417                          | ChePV   | 94                   | 222             | Uncharacterized protein      | Q9ICF9            | V002 | 85                   | Q6VZ23            | CNPV324 | 92                |
| 005 | 2791:3123<br>(110)                       | QGM48631.1                 | 87                           | MPPV    | 77                   | 118             | ankyrin repeat protein       | Q9J569            | V162 | 38                   | Q6VZ24            | CNPV323 | 76                |
| 006 | 3225:3599<br>(124)                       | QGM48969.1                 | 238                          | MPPV    | 90                   | 124             | EFc-like protein             | Q9ICF5            | V256 | 65                   | Q6VZ26            | CNPV321 | 80                |
| 007 | 4059:4526<br>(155)                       | ARE67233.1                 | 230                          | SWPV    | 68                   | 190             | C-type lectin                |                   |      |                      | Q6VZX9            | CNPV018 | 76                |
| 008 | 4868:5260<br>(130)                       | ARF02624.1                 | 242                          | SWPV    | 83                   | 138             | C-type lectin protein        | Q9ICC1            | V003 | 43                   | Q6VZW<br>2        | CNPV035 | 35                |
| 009 | 5432:5953<br>(173)                       | ARF02623.1                 | 356                          | SWPV    | 91                   | 174             | C-type lectin-like protein   |                   |      |                      | Q6VZY9            | CNPV008 | 49                |
| 010 | 6220:7683<br>(487)                       | YP_00904625<br>3.1         | 513                          | PIPV    | 60                   | 518             | ankyrin repeat protein       | Q9J4Z4            | V246 | 30                   | Q6VZX6            | CNPV021 | 30                |
| 011 | 8197:9009<br>(270)                       | ARF02625.1                 | 328                          | SWPV    | 65                   | 487             | ankyrin repeat protein       | Q9J4Z4            | V246 | 31                   | Q6VZ29            | CNPV318 | 60                |
| 012 | 9123:9485<br>(120)                       |                            |                              |         |                      |                 | ankyrin repeat protein       |                   |      |                      |                   |         |                   |
| 013 | 9697:10422<br>(241)                      | ARF02856.1                 | 315                          | SWPV    | 69                   | 240             | Ig-like domain protein       |                   |      |                      | Q6VZY3            | CNPV014 | 57                |

|     |                       |            |      |       |    |     |                                            |                |      |    |        |         |    |
|-----|-----------------------|------------|------|-------|----|-----|--------------------------------------------|----------------|------|----|--------|---------|----|
| 014 | 10428:1114<br>7 (239) | ARF02855.1 | 219  | SWPV  | 50 | 230 | Ig-like domain protein                     | Q9J5I4         | V017 | 26 | Q6VZY3 | CNPV014 | 50 |
| 015 | 11238:1225<br>1 (337) | ARE67555.1 | 393  | SWPV  | 69 | 315 | G protein-coupled<br>receptor-like protein | Q9J5I0         | V021 | 39 | Q6VZ32 | CNPV315 | 69 |
| 016 | 12340:1386<br>3 (507) | ARF02853.1 | 567  | SWPV  | 63 | 513 | ankyrin repeat protein                     | Q9J4Z4         | V246 | 37 | Q6VZY6 | CNPV011 | 34 |
| 017 | 13950:1570<br>1 (583) | UOX38538.1 | 827  | FIPV  | 69 | 629 | ankyrin repeat protein                     | Q9J4Z8         | V242 | 57 | Q6VZ33 | CNPV314 | 69 |
| 018 | 15746:1632<br>7 (193) | ARF02851.1 | 269  | SWPV  | 73 | 213 | Ig-like domain protein                     | Q9J5I4         | V017 | 42 | Q6VZ34 | CNPV313 | 66 |
| 019 | 16950:1712<br>0 (56)  | ARE67549.1 | 67.8 | SWPV  | 67 | 124 | EFc-like protein                           |                |      |    | Q6VZ36 | CNPV311 | 60 |
| 020 | 17136:1880<br>6 (556) | QRI43027.1 | 599  | ChePV | 62 | 537 | ankyrin repeat protein                     | Q9J4Z4         | V246 | 32 | Q6VZ37 | CNPV310 | 57 |
| 021 | 18867:1945<br>4 (195) | UOX38559.1 | 323  | FIPV  | 79 | 196 | ankyrin repeat protein                     | O90760         | V031 | 35 | Q6VZ38 | CNPV309 | 78 |
| 022 | 19570:2064<br>6 (358) | QRI43025.1 | 631  | ChePV | 88 | 358 | ankyrin repeat protein                     | P14360         | V240 | 37 | Q6VZ39 | CNPV308 | 64 |
| 023 | 20814:2130<br>8 (164) | ARF02845.1 | 194  | SWPV  | 65 | 165 | C-type lectin-like protein                 | P14371         | V239 | 49 | Q6VZ40 | CNPV307 | 60 |
| 024 | 21298:2155<br>5 (85)  | ARF02844.1 | 50.1 | SWPV  | 35 | 67  | ankyrin repeat protein                     |                |      |    |        |         |    |
| 025 | 21638:2246<br>2 (274) | QRI43022.1 | 358  | ChePV | 73 | 262 | N1R/p28-like protein                       | P14365         | V236 | 39 | Q6VZ42 | CNPV305 | 61 |
| 026 | 22491:2392<br>1 (476) | QRI43021.1 | 761  | ChePV | 80 | 466 | ankyrin repeat protein                     | Q9J503         | V232 | 43 | Q6VZ43 | CNPV304 | 66 |
| 027 | 24194:2569<br>6 (500) | QRI43020.1 | 880  | ChePV | 88 | 500 | ankyrin repeat protein                     | Q9J504         | V231 | 43 | Q6VZ44 | CNPV303 | 72 |
| 028 | 25790:2633<br>8 (182) | QRI43019.1 | 231  | ChePV | 66 | 193 | domain-containing protein                  | A0A7G0<br>WYC2 | V229 | 38 | Q6VZ45 | CNPV302 | 53 |

|     |                       |             |     |       |    |     |                                    |        |      |    |        |         |    |
|-----|-----------------------|-------------|-----|-------|----|-----|------------------------------------|--------|------|----|--------|---------|----|
| 029 | 26342:2787<br>1 (509) | QRI43018.1  | 791 | ChePV | 78 | 527 | ankyrin repeat protein             | Q9J502 | V233 | 30 | Q6VZ46 | CNPV301 | 66 |
| 030 | 27921:2921<br>6 (431) | ARF02838.1  | 504 | SWPV  | 63 | 432 | ankyrin repeat protein             | Q9J507 | V228 | 32 | Q6VZV5 | CNPV042 | 35 |
| 031 | 29333:3005<br>8 (241) | QRI43017.1  | 440 | ChePV | 90 | 244 | ankyrin repeat protein             | Q9J508 | V227 | 80 | Q6VZ47 | CNPV300 | 80 |
| 032 | 30152:3105<br>1 (299) | QRI43016.1  | 478 | ChePV | 81 | 873 | serine/threonine protein<br>kinase | Q9J509 | V226 | 56 | Q6VZ48 | CNPV299 | 70 |
| 033 | 31055:3134<br>8 (97)  | QRI43016.1  | 169 | ChePV | 86 | 873 | ankyrin repeat protein             | Q9J513 | V222 | 34 | Q6VZ49 | CNPV298 | 65 |
| 034 | 31326:3280<br>4 (492) | QRI43016.1  | 790 | ChePV | 86 | 873 | ankyrin repeat protein             | Q9J511 | V224 | 52 | Q6VZ49 | CNPV298 | 70 |
| 035 | 32836:3505<br>8 (740) | QRI43015.1  | 945 | ChePV | 67 | 737 | ankyrin repeat protein             | Q9J513 | V222 | 35 | Q6VZ50 | CNPV297 | 61 |
| 036 | 35107:3642<br>3 (438) | QRI43014.1  | 788 | ChePV | 89 | 442 | ankyrin repeat protein             | Q9J516 | V219 | 47 | Q6VZ51 | CNPV296 | 69 |
| 037 | 36474:3766<br>4 (396) | QRI43013.1  | 632 | ChePV | 85 | 396 | ankyrin repeat protein             | Q9J517 | V218 | 36 | Q6VZ52 | CNPV295 | 75 |
| 038 | 37740:3872<br>3 (327) | ARF02829.1  | 420 | SWPV  | 67 | 330 | Uncharacterized protein            | Q9J518 | V217 | 52 |        |         |    |
| 039 | 38792:3929<br>2 (166) | UOX38555.1  | 202 | FIPV  | 64 | 418 | ankyrin repeat protein             | P14360 | V240 | 29 | Q6VZ53 | CNPV294 | 63 |
| 040 | 39345:4003<br>7 (230) | NP_955317.1 | 369 | CNPV  | 82 | 430 | ankyrin repeat protein             |        |      |    | Q6VZ53 | CNPV294 | 82 |
| 041 | 40090:4095<br>3 (287) | QGM48928.1  | 345 | MPPV  | 64 | 284 | ankyrin repeat protein             | Q9J519 | V216 | 37 | Q6VZ54 | CNPV293 | 62 |
| 042 | 41840:4195<br>9 (39)  |             |     |       |    |     |                                    |        |      |    |        |         |    |
| 043 | 41704:4182<br>0 (38)  | QRI43008.1  | 75  | ChePV | 70 | 75  | Uncharacterized protein            | Q9J520 |      |    |        |         |    |

|     |                       |             |     |       |    |     |                                             |        |      |    |        |         |    |
|-----|-----------------------|-------------|-----|-------|----|-----|---------------------------------------------|--------|------|----|--------|---------|----|
| 044 | 41985:4236<br>8 (127) | ARF02823.1  | 126 | SWPV  | 51 | 132 | interleukin binding protein                 | Q9J521 | V214 | 60 | Q6VZ58 | CNPV289 | 51 |
| 045 | 42399:4277<br>6 (125) | QRI43006.1  | 184 | ChePV | 78 | 147 | C-type lectin-like protein                  |        |      |    | Q6VZ59 | CNPV288 | 59 |
| 046 | 42949:4343<br>4 (161) | NP_955310.1 | 225 | CNPV  | 75 | 161 | Recep_L_domain<br>domain-containing protein | Q9J522 | V213 | 51 | Q6VZ60 | CNPV287 | 75 |
| 047 | 43480:4439<br>1 (303) | QRI43004.1  | 551 | ChePV | 94 | 305 | serine/threonine-protein<br>kinase          | Q9J523 | V212 | 56 | Q6VZ61 | CNPV286 | 82 |
| 048 | 44399:4477<br>9 (126) | UOX38581.1  | 158 | FIPV  | 66 | 124 | EGF-like protein                            | Q9J524 | V211 | 41 | Q6VZ62 | CNPV285 | 69 |
| 049 | 44885:4532<br>8 (147) | ARF02818.1  | 136 | SWPV  | 61 | 192 | interleukin binding protein                 |        |      |    | Q6VZ63 | CNPV284 | 41 |
| 050 | 45494:4581<br>7107    | NP_955306.1 | 158 | CNPV  | 72 | 111 | CC chemokine-like<br>protein                |        |      |    | Q6VZ64 | CNPV283 | 72 |
| 051 | 45923:4628<br>8 (121) | QRI43000.1  | 213 | ChePV | 88 | 120 | HT motif protein                            | Q9J578 | V152 | 34 | Q6VZ65 | CNPV282 | 74 |
| 052 | 46318:4690<br>2 (194) | QRI42999.1  | 321 | ChePV | 78 | 214 | Uncharacterized protein                     |        |      |    | Q6VZ66 | CNPV281 | 70 |
| 053 | 47008:4741<br>2 (134) | QRI42998.1  | 221 | ChePV | 85 | 134 | HT motif protein                            |        |      |    | Q6VZ67 | CNPV280 | 68 |
| 054 | 47405:4791<br>4 (169) | QGM48914.1  | 259 | MPPV  | 75 | 173 | beta-NGF-like protein                       | Q9J5D9 | V072 | 29 | Q6VZ68 | CNPV279 | 74 |
| 055 | 47985:4827<br>8 (97)  | QRI42996.1  | 179 | ChePV | 87 | 96  | HTH_Tnp_4<br>domain-containing protein      | Q9J528 | V207 | 64 | Q6VZ69 | CNPV278 | 80 |
| 056 | 48289:4922<br>1 (310) | UWX11446.1  | 511 | CRPV  | 88 | 310 | G protein-coupled<br>receptor-like protein  | Q9J529 | V206 | 65 | Q6VZ70 | CNPV277 | 87 |
| 057 | 49335:5002<br>4 (229) | ARF02811.1  | 195 | SWPV  | 63 | 227 | Uncharacterized protein                     | Q9J530 | V205 | 40 | Q6VZ71 | CNPV276 | 56 |

|      |                       |                    |     |       |    |     |                                                  |        |      |    |        |          |    |
|------|-----------------------|--------------------|-----|-------|----|-----|--------------------------------------------------|--------|------|----|--------|----------|----|
| 058  | 50018:5104<br>3 (341) | UWX11444.1         | 473 | CRPV  | 76 | 338 | serpin-like protein                              | Q9J531 | V204 | 54 | Q6VZ72 | CNPV275  | 76 |
| 059  | 51093:5190<br>8 (271) | UOX38664.1         | 364 | FIPV  | 71 | 272 | tyrosine protein kinase                          | Q77NS7 | V203 | 51 | Q6VZ73 | CNPV274  | 69 |
| 060  | 51988:5281<br>2274    | ARF02808.1         | 389 | SWPV  | 76 | 276 | Uncharacterized protein                          | Q77NS8 | V201 | 49 | Q80GP9 | CNPV 201 | 67 |
| 061  | 53066:5344<br>6 (126) | ARF02807.1         | 93  | SWPV  | 55 | 172 |                                                  |        |      |    |        |          |    |
| *062 | 53494:5400<br>9 (171) | QRI42990.1         | 312 | ChePV | 85 | 181 | C-type lectin like protein                       | Q9J535 | V198 | 68 | Q80FJ5 | CVPV198  | 80 |
| 063  | 54185:5503<br>9 (284) | QRI42989.1         | 513 | ChePV | 98 | 284 | Virion assembly protein                          | Q9J536 | V197 | 78 | Q80GQ1 | CNPV 197 | 89 |
| *064 | 55036:5539<br>5 (119) | QRI42988.1         | 197 | ChePV | 82 | 119 | Uncharacterized protein                          | Q9J537 | V196 | 45 | Q6VZ77 | CNPV270  | 70 |
| 065  | 55404:5574<br>5 (113) | QRI42987.1         | 220 | ChePV | 96 | 113 | A31R ortholog                                    | Q9J538 | V195 | 68 | Q6VZ78 | CNPV269  | 75 |
| 066  | 55755:5587<br>4 (39)  | YP_00904619<br>2.1 | 40  | PEPV  | 67 | 38  | A30.5L-like protein                              |        |      |    |        |          |    |
| 067  | 55893:5611<br>7 (74)  | QRI42986.1         | 102 | ChePV | 96 | 75  | Uncharacterized protein                          | Q9J539 | V194 | 72 | Q80GQ4 | CNPV 194 | 76 |
| *068 | 56119:5700<br>3 (294) | QRI42985.1         | 568 | ChePV | 91 | 305 | DNA-directed RNA<br>polymerase 35 kDa<br>subunit | Q9J540 | V193 | 66 | Q6VZ80 | CNPV267  | 79 |
| *069 | 57018:5744<br>0 (140) | QRI42984.1         | 279 | ChePV | 95 | 140 | Viral replication protein<br>A28-like<br>A type  | Q9J541 | V192 | 85 | Q6VZ81 | CNPV266  | 91 |
| *070 | 57441:5883<br>8 (465) | ARF02802.1         | 670 | SWPV  | 76 | 471 | inclusion-like/fusion<br>protein                 | Q9J542 | V191 | 62 | Q6VZ81 | CNPV266  | 66 |
| 071  | 58928:6025<br>0 (440) | QRI42982.1         | 722 | ChePV | 92 | 601 | A type inclusion-like<br>protein                 | Q9J543 | V190 | 81 | Q6VZ83 | CNPV264  | 87 |

|      |                        |            |      |       |    |      |                                             |        |      |    |        |         |    |
|------|------------------------|------------|------|-------|----|------|---------------------------------------------|--------|------|----|--------|---------|----|
| 072  | 60301:6070<br>2 (133)  | QRI42982.1 | 139  | ChePV | 86 | 601  | A type inclusion-like<br>protein            | Q9J543 | V190 | 58 | Q6VZ83 | CNPV264 | 74 |
| *073 | 60691:6416<br>4 (1157) | QRI42981.1 | 2214 | ChePV | 98 | 1157 | DNA-directed RNA<br>polymerase              | Q9J544 | V189 | 91 | Q6VZ84 | CNPV263 | 95 |
| *074 | 64243:6539<br>4 (383)  | QRI42980.1 | 710  | ChePV | 96 | 383  | intermediate transcription<br>factor        | Q9J545 | V188 | 74 | Q6VZ85 | CNPV262 | 85 |
| *075 | 65411:6587<br>8 (155)  | QRI42979.1 | 293  | ChePV | 95 | 152  | Holliday junction<br>resolvase              | Q9J546 | V187 | 67 | Q6VZ86 | CNPV261 | 84 |
| *076 | 65891:6719<br>8 (435)  | QRI42978.1 | 753  | ChePV | 91 | 431  | DNA polymerase<br>processivity factor       | Q9J547 | V185 | 68 | Q6VZ87 | CNPV259 | 83 |
| *077 | 67245:6753<br>5 (96)   | QRI42977.1 | 193  | ChePV | 95 | 112  | Virion membrane protein<br>homolog          | Q9J548 | V186 | 77 | Q6VZ88 | CNPV260 | 90 |
| *078 | 67543:6780<br>3 (86)   | QRI42976.1 | 130  | ChePV | 98 | 89   | Protein A19 homolog                         | Q9J549 | V184 | 74 | Q6VZ89 | CNPV258 | 76 |
| *079 | 67771:6915<br>9 (462)  | QRI42975.1 | 873  | ChePV | 95 | 462  | DNA helicase,<br>transcriptional elongation | Q9J550 | V183 | 84 | Q6VZ90 | CNPV257 | 90 |
| *080 | 69177:6974<br>6 (189)  | QRI42974.1 | 315  | ChePV | 88 | 192  | Virion membrane protein                     | Q9J551 | V182 | 78 | Q6VZ91 | CNPV256 | 85 |
| *081 | 69757:7086<br>0 (367)  | QRI42973.1 | 662  | ChePV | 93 | 368  | Protein A19 homolog                         | Q9J552 | V181 | 77 | Q6VZ92 | CNPV255 | 89 |
| *082 | 70844:7113<br>4 (96)   | QRI42972.1 | 177  | ChePV | 89 | 96   | Core protein A15 homolog                    | Q9J553 | V180 | 64 | Q6VZ93 | CNPV254 | 76 |
| *083 | 71328:7160<br>6 (92)   | QRI42970.1 | 140  | ChePV | 99 | 92   | Virion envelope protein                     | Q9J554 | V179 | 72 | Q6VZ95 | CNPV252 | 67 |
| *084 | 71748:7186<br>4 (38)   | QRI42969.1 | 75   | ChePV | 92 | 69   | IMV membrane protein                        | Q9J555 | V178 | 63 | Q6VZ96 | CNPV251 | 83 |
| 085  | 71853:7202<br>6 (57)   | ARF02792.1 | 77   | SWPV  | 66 | 73   | Uncharacterized protein                     |        |      |    |        |         |    |
| *086 | 72086:7260<br>1 (171)  | QRI42967.1 | 296  | ChePV | 92 | 168  | virion protein                              | Q9J557 | V176 | 58 | Q6VZ98 | CNPV249 | 82 |

|      |                        |            |      |       |    |     |                                                  |        |      |    |        |         |    |
|------|------------------------|------------|------|-------|----|-----|--------------------------------------------------|--------|------|----|--------|---------|----|
| *087 | 72598:7344<br>9 (283)  | QRI42966.1 | 412  | ChePV | 88 | 279 | Protein A11 homolog                              | Q9J558 | V175 | 68 | Q6VZ99 | CNPV248 | 80 |
| *088 | 73467:7616<br>9 (900)  | QRI42965.1 | 1620 | ChePV | 95 | 893 | virion core protein                              | Q9J559 | V174 | 71 | Q6VZA0 | CNPV247 | 83 |
| *089 | 76362:7726<br>4: (300) | QRI42963.1 | 594  | ChePV | 97 | 300 | intermediate transcription<br>factor             | Q9J561 | V172 | 78 | Q6VZA2 | CNPV245 | 92 |
| *090 | 77328:7945<br>7 (709)  | QRI42962.1 | 1370 | ChePV | 98 | 709 | Early transcription factor<br>82 kDa subunit     | Q9J562 | V171 | 87 | Q6VZA3 | CNPV244 | 95 |
| *091 | 79464:8058<br>5 (373)  | QRI42962.1 | 650  | ChePV | 94 | 373 | Protein A6 homolog                               | Q9J563 | V170 | 65 | Q6VZA4 | CNPV243 | 86 |
| *092 | 80580:8109<br>8 (172)  | QRI42960.1 | 293  | ChePV | 96 | 169 | DNA-directed RNA<br>polymerase 19 kDa<br>subunit | Q05569 | V169 | 72 | Q6VZA5 | CNPV242 | 90 |
| *093 | 81137:8183<br>2 (231)  | QRI42959.1 | 207  | ChePV | 52 | 215 | immunodominant virion<br>protein                 | Q9J564 | V168 | 35 | Q6VZA6 | CNPV241 | 42 |
| *094 | 81919:8390<br>1 (660)  | QRI42958.1 | 1339 | ChePV | 99 | 659 | virion core protein                              | P17355 | V167 | 85 | Q6VZA7 | CNPV240 | 89 |
| *095 | 83915:8413<br>3 (72)   | ARE67721.1 | 140  | SWPV  | 94 | 72  | virion redox protein                             | Q9J565 | V166 | 80 | Q6VZA8 | CNPV239 | 80 |
| *096 | 84130:8480<br>7 (225)  | QRI42956.1 | 431  | ChePV | 98 | 225 | late transcription factor                        | Q9J566 | V165 | 92 | Q6VZA9 | CNPV238 | 96 |
| 097  | 84782:8633<br>5 (517)  | ARF02784.1 | 469  | SWPV  | 50 | 559 | ankyrin repeat protein                           | Q9J4Z4 | V246 | 29 | Q6VZB3 | CNPV234 | 35 |
| 098  | 86373:8734<br>7 (324)  | QRI42954.1 | 651  | ChePV | 98 | 323 | ribonucleotide reductase<br>small subunit        |        |      |    | Q6VZB1 | CNPV236 | 87 |
| 099  | 87452:8850<br>(351)    | QGM48866.1 | 140  | MGPV  | 30 | 470 | ankyrin repeat protein                           | Q9J5H8 | V023 | 39 | Q6VZB4 | CNPV233 | 26 |
| 100  | 88564:8867<br>7 (37)   | UOX38547.1 | 42   | FIPV  | 59 | 508 | ankyrin repeat protein                           |        |      |    |        |         |    |
| 101  | 88695:8890             | QRI42952.1 | 107  | ChePV | 87 | 454 | ankyrin repeat protein                           |        |      |    | Q6VZB3 | CNPV234 | 52 |

|     |                       |             |      |       |    |     |                                           |        |      |    |        |         |    |
|-----|-----------------------|-------------|------|-------|----|-----|-------------------------------------------|--------|------|----|--------|---------|----|
|     | 7 (70)                |             |      |       |    |     |                                           |        |      |    |        |         |    |
| 102 | 88970:8978<br>2 (270) | QRI42952.1  | 445  | ChePV | 95 | 454 | ankyrin repeat protein                    | Q9J4Z4 | V246 | 33 | Q6VZB3 | CNPV234 | 69 |
| 103 | 90088:9154<br>5 (485) | ARE67470.1  | 467  | SWPV  | 59 | 471 | ankyrin repeat protein                    | Q9J4Z4 | V246 | 29 | Q6VZB4 | CNPV233 | 59 |
| 104 | 91651:9223<br>2 (193) | QRM16127.1  | 174  | ALPV  | 55 | 287 | N1R/p28-like protein                      | P14365 | V236 | 32 | Q6VZI8 | CNPV159 | 50 |
| 105 | 92277:9288<br>8 (203) | ARE67467.1  | 231  | SWPV  | 59 | 204 | CC chemokine-like<br>protein              | P21973 | V060 | 36 | Q6VZB5 | CNPV232 | 60 |
| 106 | 92931:9337<br>4 (147) | NP_955254.1 | 112  | CNPV  | 52 | 158 | MyD116-like domain<br>protein             |        |      |    | Q6VZB6 | CNPV231 | 52 |
| 107 | 93642:9427<br>7 (193) | QRI42932.1  | 272  | ChePV | 66 | 216 | deoxycytidine kinase-like<br>protein      | P21974 | V059 | 24 | Q6VZD4 | CNPV213 | 58 |
| 108 | 94296:9446<br>6 (211) |             |      |       |    |     |                                           |        |      |    |        |         |    |
| 109 | 94533:9506<br>3 (176) | QRI42931.1  | 334  | ChePV | 80 | 176 | N1R/p28-like protein                      | P14364 | V248 | 31 | Q6VZD5 | CNPV212 | 75 |
| 110 | 95121:9528<br>5 (54)  | ARE67441.1  | 56.6 | SWPV  | 67 | 54  | Uncharacterized protein                   |        |      |    | Q6VZD6 | CNPV211 | 65 |
| 111 | 95340:9573<br>8 (132) | ARE67440.1  | 189  | SWPV  | 77 | 131 | N1R/p28-like protein                      | Q9J598 | V124 | 38 | Q6VZD7 | CNPV210 | 77 |
| 112 | 96054:9656<br>3 (169) | QRI42928.1  | 273  | ChePV | 76 | 310 | N1R/p28-like protein                      | P14365 | V236 | 28 | Q6VZD8 | CNPV209 | 64 |
| 113 | 96679:9719<br>4 (171) | QRI42927.1  | 253  | ChePV | 73 | 200 | Type I site-specific<br>deoxyribonuclease | Q9J571 | V160 | 43 | Q6VZD9 | CNPV208 | 70 |
| 114 | 97222:9785<br>1 (209) | QRI42926.1  | 235  | ChePV | 77 | 173 | N1R/p28-like protein                      | P14364 | V248 | 40 | Q6VZE0 | CNPV207 | 67 |
| 115 | 98019:9944<br>0 (473) | QRI42925.1  | 873  | ChePV | 96 | 439 | photolyase                                | Q77NS9 | V158 | 71 | Q6VZE1 | CNPV206 | 83 |
| 116 | 99507:1004            | QRI42924.1  | 564  | ChePV | 91 | 318 | N1R/p28-like protein                      | Q9J573 | V157 | 51 | Q6VZE2 | CNPV205 | 76 |



|      |                         |            |      |       |    |     |                                               |        |      |    |        |         |         |    |
|------|-------------------------|------------|------|-------|----|-----|-----------------------------------------------|--------|------|----|--------|---------|---------|----|
|      | 66 (319)                |            |      |       |    |     |                                               |        |      |    |        |         |         |    |
| 117  | 100693:100<br>854 (53)  | ARF02755.1 | 56.6 | SWPV  | 58 | 53  | Uncharacterized protein                       |        |      |    |        | Q6VZE3  | CNPV204 | 55 |
| 118  | 100914:102<br>074 (386) | QRI42922.1 | 612  | ChePV | 80 | 382 | N1R/p28-like protein                          | Q9J575 | V155 | 38 | Q6VZE4 | CNPV203 | 69      |    |
| 119  | 102171:103<br>001 (276) | QRI42921.1 | 458  | ChePV | 85 | 276 | N1R/p28-like protein                          | P14365 | V236 | 34 | Q6VZE5 | CNPV202 | 71      |    |
| 120  | 103036:103<br>638 (200) | ARF02752.1 | 218  | SWPV  | 62 | 197 | Uncharacterized protein                       | Q9J577 | V153 | 49 | Q6VZE6 | CNPV201 | 50      |    |
| 121  | 103764:104<br>222 (152) | QRI42919.1 | 256  | ChePV | 87 | 166 | Rep-like protein                              |        |      |    | Q6VZE7 | CNPV200 | 77      |    |
| 122  | 104252:104<br>926 (224) | QRI42918.1 | 397  | ChePV | 91 | 225 | deoxycytidine kinase-like<br>protein          | Q9J579 | V151 | 51 | Q6VZE8 | CNPV199 | 84      |    |
| 123  | 105184:105<br>681 (165) | ARF02750.1 | 196  | SWPV  | 57 | 159 | C-type lectin-like protein                    |        |      |    | Q6VZE9 | CNPV198 | 54      |    |
| 124  | 105728:106<br>570 (280) | ARF02749.1 | 390  | SWPV  | 71 | 279 | N1R/p28-like protein                          | Q9J581 | V149 | 55 | Q6VZF0 | CNPV197 | 62      |    |
| 125  | 106639:107<br>211 (190) | QRI42915.1 | 348  | ChePV | 90 | 189 | domain-containing protein                     | Q9J581 | V149 | 55 | Q6VZF1 | CNPV196 | 74      |    |
| 126  | 107257:107<br>715 (152) | UOX38608.1 | 115  | FIPV  | 47 | 141 | domain-containing protein                     |        |      |    | Q6VZF2 | CNPV195 | 50      |    |
| *127 | 107783:108<br>193 (136) | QRI42913.1 | 215  | ChePV | 78 | 140 | Virion protein                                | Q9J582 | V148 | 52 | Q6VZF3 | CNPV194 | 70      |    |
| 128  | 108199:108<br>492 (97)  | QRI42912.1 | 153  | ChePV | 90 | 104 | HT motif protein                              | Q9J583 | V147 | 58 | Q6VZF4 | CNPV193 | 82      |    |
| *129 | 108559:111<br>099 (846) | QRI42911.1 | 1578 | ChePV | 95 | 846 | mRNA-capping enzyme<br>large subunit          | Q9J584 | V146 | 75 | Q6VZF5 | CNPV192 | 90      |    |
| 130  | 111233:111<br>418 (61)  | QRI42910.1 | 121  | ChePV | 95 | 103 | Molluscum contagiosum<br>virus MC089L homolog | Q9J585 | V145 | 62 | Q6VZF6 | CNPV191 | 75      |    |
| *131 | 111381:111              | QRI42909.1 | 285  | ChePV | 93 | 153 | Late protein H7 homolog                       | Q9J586 | V144 | 56 | Q6VZF7 | CNPV190 | 83      |    |

|      |                      |            |      |       |    |      |                                                        |        |      |    |        |         |    |
|------|----------------------|------------|------|-------|----|------|--------------------------------------------------------|--------|------|----|--------|---------|----|
|      | 842 (153)            |            |      |       |    |      |                                                        |        |      |    |        |         |    |
| *132 | 111847:112797 (578)  | QRI42908.1 | 565  | ChePV | 96 | 316  | DNA topoisomerase 1                                    | Q9J587 | V143 | 77 | Q6VZF8 | CNPV189 | 91 |
| *133 | 112798:113340 (180)  | QRI42907.1 | 236  | ChePV | 76 | 170  | late transcription factor                              | Q9J588 | V142 | 53 | Q6VZF9 | CNPV188 | 71 |
|      |                      |            |      |       |    |      | RNA                                                    |        |      |    |        |         |    |
| *134 | 113490:115889 (799)  | QRI42906.1 | 1504 | ChePV | 97 | 799  | polymerase-associated transcription-specificity factor | Q9J589 | V141 | 81 | Q6VZG0 | CNPV187 | 93 |
| *135 | 115985:117007 (340)  | CDQ47768.1 | 580  | CNPV  | 99 | 340  | Immunodominant envelope protein p35                    | Q9J590 | V140 | 60 | Q6VZG1 | CNPV186 | 71 |
| 136  | 117045:118064 (339)  | ARF02739.1 | 444  | SWPV  | 69 | 337  | ankyrin repeat protein                                 | Q9J508 | V227 | 27 | Q6VZG2 | CNPV185 | 35 |
| *137 | 118056:11862 (189)   | ARF02738.1 | 344  | SWPV  | 94 | 190  | Putative viral membrane protein                        | Q9J591 | V139 | 88 | Q6VZG3 | CNPV184 | 92 |
| *138 | 118641:119141 (166)  | QRI42902.1 | 330  | ChePV | 96 | 166  | Probable dual specificity protein phosphatase          | Q9J592 | V138 | 85 | Q6VZG4 | CNPV183 | 86 |
| *139 | 119151:123017 (1288) | QRI42901.1 | 2504 | ChePV | 98 | 1288 | DNA-directed RNA polymerase 147 kDa polypeptide        | Q9J593 | V137 | 89 | Q6VZG5 | CNPV182 | 94 |
| *140 | 123060:123470 (136)  | QRI42900.1 | 234  | ChePV | 95 | 136  | Membrane protein                                       | Q85281 | V136 | 77 | Q6VZG6 | CNPV181 | 89 |
| *141 | 123463:12402 (185)   | QRI42899.1 | 359  | ChePV | 96 | 186  | DNA-directed RNA polymerase 22 kDa subunit             | Q85280 | V135 | 75 | Q6VZG7 | CNPV180 | 89 |
| *142 | 124020:124922 (300)  | QRI42898.1 | 587  | ChePV | 95 | 302  | Cap-specific mRNA (nucleoside-2'-O-)-methyltransferase | P15916 | V134 | 72 | Q6VZG8 | CNPV179 | 90 |
| *143 | 124956:125402 (148)  | QRI42897.1 | 278  | ChePV | 92 | 148  | IMV membrane protein                                   | P15915 | V133 | 74 | Q6VZG9 | CNPV178 | 91 |

|      |                         |            |      |       |    |     |                                    |        |      |    |        |         |    |
|------|-------------------------|------------|------|-------|----|-----|------------------------------------|--------|------|----|--------|---------|----|
| *144 | 125752:126<br>510 (252) | QRI42895.1 | 469  | ChePV | 96 | 252 | DNA-binding virion core<br>protein | P15913 | V131 | 71 | Q6VZH1 | CNPV176 | 88 |
| *145 | 126536:127<br>447 (303) | QRI42894.1 | 618  | ChePV | 98 | 303 | Core protein VP8                   | P15912 | V130 | 81 | Q6VZH2 | CNPV175 | 85 |
| *146 | 127437:127<br>727 (96)  | UOX38686.1 | 120  | FIPV  | 62 | 96  | L3L ortholog                       | P15911 | V129 | 37 | Q6VZH3 | CNPV174 | 60 |
| *147 | 127771:128<br>502 (243) | QRI42892.1 | 490  | ChePV | 97 | 243 | L2R ortholog                       | P15910 | V128 | 87 | Q6VZH4 | CNPV173 | 93 |
| *148 | 128503:129<br>51 (337)  | QRI42891.1 | 612  | ChePV | 98 | 335 | G9R ortholog                       | P15909 | V127 | 72 | Q6VZH5 | CNPV172 | 90 |
| *149 | 129530:130<br>312 (260) | QRI42890.1 | 533  | ChePV | 99 | 260 | late transcription factor          | P15908 | V126 | 95 | Q6VZH6 | CNPV171 | 98 |
| 150  | 130366:131<br>016 (216) | QRI42889.1 | 388  | ChePV | 87 | 212 | thymidylate kinase                 |        |      |    | Q6VZH7 | CNPV170 | 87 |
| 151  | 131069:132<br>202 (377) | UOX38632.1 | 528  | FIPV  | 75 | 391 | N1R/p28-like protein               | P14364 | V248 | 38 | Q6VZH9 | CNPV168 | 80 |
| 152  | 132268:132<br>810 (180) | QRM15799.1 | 178  | PGPV  | 60 | 168 | Ig-like domain protein             | P21975 | V055 | 45 | Q6VZI0 | CNPV167 | 55 |
| 153  | 133068:133<br>490 (140) | ARE67387.1 | 222  | SWPV  | 72 | 149 | TGF-beta-like protein              |        |      |    | Q6VZI5 | CNPV162 | 72 |
| 154  | 133534:134<br>571 (345) | UWX11321.1 | 514  | CRPV  | 73 | 356 | TGF-beta-like protein              | Q9J5D1 | V080 | 22 | Q6VZI6 | CNPV161 | 73 |
| 155  | 134688:135<br>734 (348) | ARF02770.1 | 358  | SWPV  | 83 | 318 | N1R/p28-like protein               | P14364 | V248 | 41 | Q6VZC9 | CNPV218 | 70 |
| 156  | 135947:136<br>060 (37)  |            |      |       |    |     |                                    |        |      |    |        |         |    |
| 157  | 136214:136<br>378 (54)  | QRM15791.1 | 96.3 | PGPV  | 74 | 159 | TGF-beta-like protein              |        |      |    | Q6VZI9 | CNPV157 | 69 |
| 158  | 136395:136<br>70 (104)  | QRM15791.1 | 84.3 | PGPV  | 46 | 159 | TGF-beta-like protein              |        |      |    | Q6VZI9 | CNPV157 | 42 |

|      |                         |                    |      |       |    |     |                                     |        |      |    |        |         |    |
|------|-------------------------|--------------------|------|-------|----|-----|-------------------------------------|--------|------|----|--------|---------|----|
| 159  | 136919:137<br>422 (167) | UOX38856.1         | 160  | CNPV  | 60 | 347 | TGF-beta-like protein               |        |      |    | Q6VZJ0 | CNPV158 | 57 |
| 160  | 137538:138<br>050 (170) | ARF02771.1         | 221  | SWPV  | 66 | 161 | N1R/p28-like protein                | Q9J598 | V124 | 46 | Q6VZI2 | CNPV165 | 54 |
| 161  | 138164:139<br>177 (337) | UOX38631.1         | 491  | FIPV  | 73 | 392 | N1R/p28-like protein                | Q9J598 | V124 | 56 | Q6VZI7 | CNPV160 | 72 |
| 162  | 139354:139<br>662 (102) | ARF02727.1         | 112  | SWPV  | 82 | 93  | CC chemokine gene<br>family protein | Q9J5A1 | V121 | 44 |        |         |    |
| 163  | 139805:139<br>918 (37)  |                    |      |       |    |     |                                     |        |      |    |        |         |    |
| 164  | 140228:140<br>761 (177) | YP_00904635<br>5.1 | 75.1 | PIPV  | 27 | 239 | Uncharacterized protein             |        |      |    | Q6VZC3 | CNPV224 | 45 |
| 165  | 141049:141<br>333 (94)  | YP_00917710<br>6.1 | 112  | TKPV  | 56 | 141 | beta-Nerve growth factor            | Q9J5D5 | V76  | 33 |        |         |    |
| 166  | 141568:142<br>47 (303)  | UWX11302.1         | 372  | CRPV  | 63 | 304 | thioredoxin binding<br>protein      |        |      |    | Q6VZJ8 | CNPV149 | 61 |
| *167 | 142623:143<br>666 (347) | QRI42866.1         | 570  | ChePV | 95 | 348 | virion core protein                 | Q9J5A2 | V120 | 78 | Q6VZJ9 | CNPV148 | 85 |
| *168 | 143631:144<br>197 (188) | QRI42865.1         | 343  | ChePV | 95 | 188 | G6R ortholog                        | Q9J5A3 | V119 |    | Q6VZK0 | CNPV147 | 85 |
| *169 | 144406:145<br>782 (458) | QRM15423.1         | 755  | MLPV  | 86 | 440 | G5R orthologue                      | Q9J5A5 | V117 | 63 | Q6VZK2 | CNPV145 | 81 |
| 170  | 145871:146<br>335 (154) |                    |      |       |    |     |                                     |        |      |    |        |         |    |
| 171  | 146461:148<br>119 (552) | QRM15422.1         | 807  | MLPV  | 74 | 556 | ankyrin repeat protein              | Q9J5A7 | V155 | 37 | Q6VZK3 | CNPV144 | 63 |
| 172  | 148152:150<br>149 (665) | QRM15421.1         | 858  | MLPV  | 68 | 671 | ankyrin repeat protein              | Q9J569 | V162 | 27 | Q6VZK4 | CNPV143 | 60 |
| 173  | 150287:151<br>24 (319)  | QRI42860.1         | 359  | ChePV | 60 | 321 | N1R/p28-like protein                | P14364 | V248 | 35 | Q6VZK5 | CNPV142 | 52 |

|      |                         |                    |      |       |    |      |                                           |        |      |    |        |         |    |
|------|-------------------------|--------------------|------|-------|----|------|-------------------------------------------|--------|------|----|--------|---------|----|
| 174  | 151407:151<br>958 (183) | YP_00904635<br>5.1 | 53   | PGPV  | 27 | 239  | Uncharacterized protein                   |        |      |    |        |         |    |
| 175  | 152011:152<br>559 (182) | QRI42859.1         | 329  | ChePV | 94 | 184  | HAL3-like domain protein                  | Q9J5A8 | V114 | 77 | Q6VZK6 | CNPV141 | 88 |
| 176  | 152854:153<br>051 (65)  | QRI42858.1         | 93.6 | ChePV | 91 | 66   | Replication-associated<br>protein         | Q9J5A9 | V113 | 74 | Q6VZK7 | CNPV140 | 82 |
| *177 | 153111:153<br>716 (201) | QRI42857.1         | 389  | ChePV | 91 | 213  | Putative membrane<br>protein              | Q9J5B0 | V112 | 71 | Q6VZK8 | CNPV139 | 83 |
| *178 | 153727:155<br>067 (446) | QRI42856.1         | 827  | ChePV | 95 | 444  | serine/threonine-protein<br>kinase        | Q9J5B1 | V111 | 78 | Q6VZK9 | CNPV138 | 87 |
| 179  | 155141:156<br>574 (477) | QRI42855.1         | 736  | ChePV | 83 | 462  | Protein F11 homolog                       | P36700 | V110 | 44 | Q6VZL0 | CNPV137 | 69 |
| *180 | 156606:158<br>498 (630) | QRM15414.1         | 1121 | MLPV  | 90 | 625  | Virion release protein                    | P36317 | V109 | 50 | Q6VZL1 | CNPV136 | 77 |
| *181 | 158498:159<br>634 (378) | QRI42853.1         | 755  | ChePV | 97 | 378  | Major envelope protein                    | P36316 | V108 | 85 | Q6VZL2 | CNPV135 | 91 |
| 182  | 159839:165<br>19 (1785) | QRI42852.1         | 2742 | ChePV | 76 | 1801 | variola B22R gene family<br>protein       | Q9J5B3 | V107 | 47 | Q6VZL3 | CNPV134 | 67 |
| 183  | 165254:165<br>418 (54)  | ARF02717.1         | 68.6 | SWPV  | 89 | 90   | Uncharacterized protein                   | Q9J5B4 | V106 | 48 | Q6VZL4 | CNPV133 | 62 |
| *184 | 165772:166<br>230 (152) | ARF02716.1         | 277  | SWPV  | 90 | 151  | Protein F15                               | Q9J5B5 | V105 | 79 | Q6VZL5 | CNPV132 | 76 |
| *185 | 166339:166<br>971 (210) | ARF02715.1         | 211  | SWPV  | 64 | 212  | DNA-directed RNA<br>polymerase            | Q9J5B6 | V104 | 45 | Q6VZL6 | CNPV131 | 64 |
| *186 | 167047:167<br>391 (114) | QRI42847.1         | 195  | ChePV | 87 | 119  | DNA-binding virion core<br>phosphoprotein | Q9J5B7 | V103 | 79 | Q6VZL7 | CNPV130 | 76 |
| *187 | 167385:168<br>803 (472) | QRI42846.1         | 918  | ChePV | 96 | 472  | Poly (A) polymerase<br>catalytic subunit  | P0DTA8 | V102 | 74 | Q6VZL8 | CNPV129 | 88 |
| *188 | 168796:170              | QRI42845.1         | 1320 | ChePV | 90 | 724  | Protein E2 homolog                        | Q9J5B9 | V101 | 62 | Q6VZL9 | CNPV128 | 80 |

|      |                          |                    |      |       |    |      |                                  |        |      |     |        |         |    |
|------|--------------------------|--------------------|------|-------|----|------|----------------------------------|--------|------|-----|--------|---------|----|
|      | 976 (726)                |                    |      |       |    |      |                                  |        |      |     |        |         |    |
|      |                          |                    |      |       |    |      | DNA-directed RNA                 |        |      |     |        |         |    |
| *189 | 171002:171<br>550 (182)  | QGM48759.1         | 366  | MPPV  | 99 | 182  | polymerase 30 kDa<br>polypeptide | Q9J5C0 | V100 | 86  | Q6VZM0 | CNPV127 | 99 |
| 190  | 171756:177<br>344 (1862) | UOX38824.1         | 2533 | FIPV  | 70 | 1971 | variola B22R-like protein        | Q9J5C1 | V099 | 60  | Q6VZM1 | CNPV126 | 68 |
| 191  | 177644:182<br>917 (1757) | QRM15402.1         | 2434 | MLPV  | 71 | 1767 | variola B22R-like protein        | Q9J5C2 | V098 | 57  | Q6VZM2 | CNPV125 | 70 |
| 192  | 183004:186<br>333 (1109) | QGM48756.1         | 641  | MPPV  | 58 | 1911 | variola B22R-like protein        | Q9J5A0 | V122 | 38  | Q6VZJ3 | CNPV154 | 38 |
| 193  | 186335:188<br>722 (795)  | QRI42839.1         | 1437 | FIPV  | 84 | 1902 | variola B22R-like protein        | Q9J5C3 | V097 | 76  | Q6VZM3 | CNPV124 | 84 |
| *194 | 188773:190<br>488 (571)  | NP_955146.1        | 986  | CNPV  | 87 | 571  | Protein E6 homolog               | Q9J5C4 | V096 | 76  | Q6VZM4 | CNPV123 | 87 |
| *195 | 190490:191<br>311 (273)  | QGM48754.1         | 505  | MPPV  | 89 | 274  | Virion core membrane<br>protein  | Q9J5C5 | V095 | 65  | Q6VZM5 | CNPV122 | 89 |
| *196 | 191303:194<br>269 (988)  | QRI42835.1         | 1821 | ChePV | 90 | 988  | DNA polymerase                   | P21402 | V094 | 78  | Q6VZM6 | CNPV121 | 91 |
| *197 | 194296:194<br>580 (94)   | QRI42834.1         | 181  | ChePV | 93 | 93   | FAD-linked sulfhydryl<br>oxidase | Q9J5C7 | V093 | 84  | Q6VZM7 | CNPV120 | 82 |
| 198  | 194914:196<br>866 (650)  | QRI42832.1         | 1199 | ChePV | 91 | 648  | Protein O1 homolog               | O72896 | V091 | 198 | Q6VZM9 | CNPV118 | 77 |
| *199 | 197045:197<br>977 (310)  | QRI42831.1         | 571  | ChePV | 98 | 310  | DNA-binding virion<br>protein    | Q9J5C9 | V090 | 84  | Q6VZN0 | CNPV117 | 93 |
| *200 | 197984:198<br>184 (66)   | QRI42830.1         | 86   | ChePV | 94 | 69   | Thymidine kinase                 | O72899 | V089 | 69  | Q9WII0 | CNPV116 | 75 |
| *201 | 198185:199<br>081 (298)  | QRI42829.1         | 450  | ChePV | 83 | 289  | DNA-binding<br>phosphoprotein    | P12923 | V088 | 30  | Q9WII1 | CNPV115 | 68 |
| 202  | 199424:200<br>113 (229)  | YP_00944797<br>6.1 | 165  | FGPV  | 43 | 219  | deoxycytidine kinase             | P21974 | V087 | 43  |        |         |    |



|      |                         |             |      |       |     |     |                                  |        |      |    |        |         |    |
|------|-------------------------|-------------|------|-------|-----|-----|----------------------------------|--------|------|----|--------|---------|----|
|      | 854 (54)                |             |      |       |     |     |                                  |        |      |    |        |         |    |
| 218  | 212905:213<br>816 (303) | QRI42811.1  | 543  | ChePV | 84  | 337 | DFP domain-containing<br>protein | Q9J5E0 | V071 | 58 | Q6VZQ0 | CNPV097 | 73 |
| 219  | 213929:214<br>16 (77)   | ARE67602.1  | 156  | SWPV  | 100 | 77  |                                  |        |      |    |        |         |    |
| 220  | 213929:214<br>16 (46)   | ARE67601.1  | 59   | SWPV  | 70  | 47  | Uncharacterized protein          |        |      |    | Q6VZQ2 | CNPV095 | 74 |
| 221  | 214316:215<br>152 (278) | UWX11237.1  | 511  | CRPV  | 96  | 278 | T10-like protein                 | Q9J5E1 | V070 | 56 | Q6VZQ3 | CNPV094 | 84 |
| *222 | 215254:216<br>066 (270) | UWX11235.1  | 389  | CRPV  | 76  | 268 | virion core protein              | Q9J5E2 | V069 | 54 | Q6VZQ4 | CNPV93  | 71 |
| 223  | 216253:216<br>606 (117) | UOX38786.1  | 93.2 | FIPV  | 49  | 162 | Uncharacterized protein          |        |      |    | Q6VZQ5 | CNPV092 | 60 |
| 224  | 216897:217<br>133 (78)  | NP_955114.1 | 156  | CNPV  | 89  | 83  | HT motif protein                 | Q9J5E4 | V068 | 62 | Q6VZQ6 | CNPV091 | 91 |
| 225  | 217139:217<br>339 (66)  |             |      |       |     |     |                                  |        |      |    |        |         |    |
| 226  | 217324:217<br>704 (126) | QRI42804.1  | 175  | ChePV | 74  | 127 | PIR Superfamily Protein          | Q9J5E5 | V067 | 44 | Q6VZQ7 | CNPV090 | 62 |
| 227  | 217691:218<br>203 (170) | QRM15364.1  | 244  | MLPV  | 73  | 182 | PIR Superfamily Protein          | Q9J5E5 | V066 | 59 | Q6VZQ8 | CNPV089 | 72 |
| 228  | 218178:218<br>495 (165) | ARE67659.1  | 118  | SWPV  | 62  | 104 | Uncharacterized protein          | Q9J5E6 | V065 | 35 | Q6VZQ9 | CNPV088 | 58 |
| 229  | 218533:218<br>934 (133) | QRI42802.1  | 265  | ChePV | 94  | 149 | glutathione peroxidase           | Q9J5E7 | V064 | 68 | Q6VZR0 | CNPV087 | 83 |
| 230  | 219007:219<br>135 (42)  | NP_955110.1 | 77   | CNPV  | 88  | 198 | glutathione peroxidase           | Q9J5E7 | V064 | 60 | Q6VZR0 | CNPV087 | 86 |
| 231  | 219380:220<br>126 (248) | NP_955250.1 | 319  | CNPV  | 73  | 359 | N1R/p28-like protein             | Q9J598 | V124 | 65 | Q6VZC0 | CNPV227 | 74 |
| 232  | 220464:220              | QRM15718.1  | 70.1 | PGPV  | 77  | 121 |                                  |        |      |    | Q6VZR1 | CNPV086 | 47 |



|      |                     |            |      |       |    |     |                                            |        |      |    |        |         |    |  |
|------|---------------------|------------|------|-------|----|-----|--------------------------------------------|--------|------|----|--------|---------|----|--|
|      | 631 (55)            |            |      |       |    |     |                                            |        |      |    |        |         |    |  |
| 233  | 220585:220815 (76)  | QRM15718.1 | 100  | PGPV  | 75 | 121 | Tnfr-like protein                          |        |      |    | Q6VZR1 | CNPV086 | 64 |  |
| 234  | 220891:222069 (392) | QRM15717.1 | 632  | PGPV  | 86 | 395 | domain-containing protein                  | P21971 | V063 | 36 | Q6VZD1 | CNPV216 | 39 |  |
| 235  | 222124:222966 (280) | QRI42800.1 | 383  | ChePV | 69 | 303 | RNA phosphatase                            |        |      |    | Q6VZR2 | CNPV085 | 60 |  |
| *236 | 223000:223656 (218) | QRI42799.1 | 413  | ChePV | 88 | 218 | uracil DNA glycosylase                     | P21968 | V062 | 80 | Q6VZR3 | CNPV084 | 89 |  |
| 237  | 223663:224250 (195) | ARF02679.1 | 338  | SWPV  | 85 | 195 | CC chemokine-like protein                  | P21973 | V061 | 33 | Q6VZB5 | CNPV232 | 28 |  |
| *238 | 224381:226759 (792) | QRI42797.1 | 1539 | ChePV | 95 | 794 | NTPase, DNA replication                    | P21969 | V060 | 79 | Q6VZR5 | CNPV082 | 90 |  |
| 239  | 227129:228079 (316) | QRI42796.1 | 380  | ChePV | 64 | 334 | Ig-like domain protein                     | P21975 | V059 | 34 | Q6VZR6 | CNPV081 | 56 |  |
| *240 | 228579:230480 (633) | QRI42795.1 | 1220 | ChePV | 99 | 633 | Early transcription factor 70 kDa subunit  | P21966 | V058 | 93 | Q6VZR7 | CNPV080 | 98 |  |
| *241 | 230467:23095 (163)  | QRI42793.1 | 314  | ChePV | 96 | 160 | DNA-directed RNA polymerase 18 kDa subunit | P21967 | V057 | 80 | Q6VZR9 | CNPV078 | 87 |  |
| 242  | 231587:231988 (133) | ARE67642.1 | 139  | SWPV  | 59 | 435 | ankyrin repeat protein                     | Q9J4Z4 | V056 | 38 | Q6VZ56 | CNPV291 | 40 |  |
| 243  | 232014:232784 (256) | ARE67642.1 | 201  | SWPV  | 48 | 435 | ankyrin repeat protein                     | Q9J569 | V055 | 30 | Q6VZJ7 | CNPV150 | 32 |  |
| *244 | 232959:233669 (236) | QRI42792.1 | 432  | ChePV | 93 | 232 | Putative Nudix hydrolase                   | P21970 | V054 | 71 | Q6VZS1 | CNPV076 | 80 |  |
| *245 | 233695:234333 (212) | QRM15352.1 | 338  | MLPV  | 87 | 265 | mRNA-decapping protein                     | P32817 | V053 | 69 | Q6VZS2 | CNPV075 | 78 |  |
| *246 | 234330:236237 (635) | QRI42790.1 | 1244 | ChePV | 96 | 635 | Nucleoside triphosphate phosphohydrolase I | O72907 | V052 | 83 | Q6VZS3 | CNPV074 | 94 |  |

|      |                         |            |      |       |    |     |                                                 |        |      |    |        |         |    |
|------|-------------------------|------------|------|-------|----|-----|-------------------------------------------------|--------|------|----|--------|---------|----|
| 247  | 236355:236<br>633 (92)  | ARF02674.1 | 99   | SWPV  | 72 | 110 |                                                 |        |      |    |        |         |    |
| 248  | 236651:237<br>511 (286) | UWX11204.1 | 246  | CRPV  | 54 | 286 | CC chemokine-like<br>protein                    |        |      |    | Q6VZS5 | CNPV072 | 46 |
| *249 | 237556:238<br>425 (289) | QRI42787.1 | 573  | ChePV | 98 | 289 | mRNA capping enzyme<br>small subunit            | O72908 | V051 | 79 | Q6VZS6 | CNPV071 | 91 |
| *250 | 238456:240<br>117 (553) | QRM15347.1 | 1040 | MLPV  | 98 | 551 | rifampicin resistance<br>protein                | O72909 | V050 | 84 | Q6VZS7 | CNPV070 | 89 |
| *251 | 240134:240<br>598 (154) | QRI42785.1 | 282  | ChePV | 98 | 155 | late transcription factor                       | O72910 | V049 | 70 | Q6VZS8 | CNPV069 | 87 |
| 252  | 240702:241<br>550 (282) | QRI42784.1 | 506  | ChePV | 93 | 257 | GNS1/SUR4 protein                               | Q9J5F5 | V048 | 83 | Q6VZS9 | CNPV068 | 86 |
| 253  | 241639:241<br>809 (56)  |            |      |       |    |     |                                                 |        |      |    |        |         |    |
| 254  | 241909:242<br>487 (192) |            |      |       |    |     |                                                 |        |      |    |        |         |    |
| 255  | 242558:244<br>309 (583) | QRI42781.1 | 768  | ChePV | 71 | 583 | semaphorin-like protein                         | Q9J5F6 | V047 | 47 | Q6VZT2 | CNPV065 | 66 |
| 256  | 244502:244<br>630 (42)  |            |      |       |    |     |                                                 |        |      |    |        |         |    |
| 257  | 244704:245<br>258 (184) | ARF02669.1 | 261  | SWPV  | 69 | 272 | TGF-beta-like protein                           |        |      |    | Q6VZT3 | CNPV064 | 61 |
| 258  | 245315:246<br>184 (289) | QRI42779.1 | 539  | ChePV | 92 | 358 | hydroxysteroid<br>dehydrogenase-like<br>protein | Q67477 | V045 | 59 | Q6VZT4 | CNPV063 | 76 |
| 259  | 246464:247<br>525 (353) | QRM15339.1 | 590  | MLPV  | 87 | 350 | serpin-like protein                             | Q9J5F9 | V044 | 50 | Q6VZT5 | CNPV062 | 76 |
| 260  | 247567:249<br>261 (564) | QRI42777.1 | 1077 | ChePV | 91 | 567 | DNA ligase                                      | Q67480 | V043 | 72 | Q6VZT6 | CNPV061 | 85 |
| 261  | 249346:250              | ARF02665.1 | 186  | SWPV  | 59 | 236 | E3 CR1-beta                                     | Q9J5G2 | V041 | 57 | Q6VZT7 | CNPV060 | 49 |

|     |                         |            |      |       |    |     |                                                        |        |      |    |        |         |    |
|-----|-------------------------|------------|------|-------|----|-----|--------------------------------------------------------|--------|------|----|--------|---------|----|
|     | 071 (241)               |            |      |       |    |     |                                                        |        |      |    |        |         |    |
| 262 | 250138:251<br>157 (339) | QRI42775.1 | 591  | ChePV | 92 | 338 | serpin-like protein                                    | Q9J5G3 | V040 | 51 | Q6VZT8 | CNPV059 | 69 |
| 263 | 251216:251<br>761 (181) | QRI42774.1 | 256  | ChePV | 71 | 180 | Bcl-2-like protein                                     | Q9J5G4 | V039 | 42 | Q6VZT9 | CNPV058 | 56 |
| 264 | 251799:252<br>713 (304) | QRM15334.1 | 499  | MLPV  | 72 | 301 | serpin-like protein                                    | Q9J5G3 | V040 | 31 | Q6VZU0 | CNPV057 | 67 |
| 265 | 252754:253<br>191 (145) | QRI42772.1 | 253  | ChePV | 94 | 145 | Deoxyuridine<br>5'-triphosphate<br>nucleotidohydrolase | Q9J5G5 | V038 | 69 | Q6VZU1 | CNLV056 | 80 |
| 266 | 253188:253<br>67 (162)  | QRI42771.1 | 262  | ChePV | 88 | 321 | Uncharacterized protein                                | Q9J5G6 | V037 | 37 | Q6VZU2 | CNPV055 | 74 |
| 267 | 253732:254<br>142 (136) | QRM15331.1 | 156  | MLPV  | 68 | 140 | Orfan                                                  | Q9J5G7 | V036 | 33 | Q6VZU3 | CNPV054 | 61 |
| 268 | 254224:254<br>631 (135) | QRI42770.1 | 255  | ChePV | 88 | 146 | Deoxyuridine<br>5'-triphosphate<br>nucleotidohydrolase | Q9J5G5 | V035 | 69 | Q6VZU4 | CNPV053 | 70 |
| 269 | 254745:255<br>749 (334) | ARF02658.1 | 427  | SWPV  | 68 | 329 | ankyrin repeat protein                                 | Q9J5G9 | V034 | 48 | Q6VZY0 | CNPV017 | 37 |
| 270 | 255803:256<br>342 (179) | QRM15329.1 | 166  | MLPV  | 70 | 171 | C-type lectin-like protein                             |        |      |    | Q64335 | CNPV052 | 61 |
| 271 | 256409:256<br>633 (74)  | ARF02656.1 | 74.7 | SWPV  | 62 | 398 | DNase II-like protein                                  |        |      |    | Q6VZU6 | CNPV051 | 57 |
| 272 | 256626:257<br>594 (322) | QRI42768.1 | 555  | ChePV | 84 | 408 | DNase II-like protein                                  |        |      |    | Q6VZU6 | CNPV051 | 72 |
| 273 | 257691:258<br>686 (331) | QRI42767.1 | 532  | ChePV | 69 | 352 | ankyrin repeat protein                                 | O90760 | V031 | 44 | Q6VZU7 | CNPV050 | 69 |
| 274 | 258707:259<br>153 (148) | ARF02654.1 | 143  | SWPV  | 49 | 148 | Uncharacterized protein                                |        |      |    | Q6VZU8 | CNPV049 | 47 |
| 275 | 259241:261              | QRM15325.1 | 1379 | MLPV  | 84 | 801 | alkaline                                               | Q9J5H1 | V030 | 57 | Q6VZU9 | CNPV048 | 69 |

|     | 622 (793)               |                    |      |       |    |     | phosphodiesterase-like<br>protein          |        |      |    |            |         |    |
|-----|-------------------------|--------------------|------|-------|----|-----|--------------------------------------------|--------|------|----|------------|---------|----|
| 276 | 261813:262<br>190 (125) | QRM15324.1         | 234  | MLPV  | 91 | 124 | peptidyl-tRNA hydrolase                    | Q9J5H2 | V029 | 58 | Q6VZV0     | CNPV047 | 71 |
| 277 | 262226:263<br>584 (452) | QRI42763.1         | 792  | ChePV | 93 | 450 | ankyrin repeat protein                     | Q9J5I7 | V218 | 30 | Q6VZV1     | CNPV046 | 74 |
| 278 | 263626:264<br>618 (330) | QRI42762.1         | 508  | ChePV | 82 | 332 | interleukin 18<br>receptor-like protein    | Q9J5H4 | V027 | 46 | Q6VZV2     | CNPV045 | 71 |
| 279 | 264741:265<br>949 (402) | YP_00904603<br>0.1 | 270  | PEPV  | 42 | 406 | ankyrin repeat protein                     | Q9J5H5 | V026 | 42 | Q6VZ56     | CNPV291 | 28 |
| 280 | 266032:267<br>459 (475) | QRI42761.1         | 820  | ChePV | 91 | 480 | ankyrin repeat protein                     | Q9J5H7 | V024 | 31 | Q6VZV3     | CNPV044 | 73 |
| 281 | 267503:268<br>108 (201) | QRI42760.1         | 328  | ChePV | 86 | 201 | Uncharacterized protein                    | Q9J5H6 | V025 | 57 | Q6VZV4     | CNPV043 | 75 |
| 282 | 268251:270<br>062 (603) | QRI42759.1         | 1095 | ChePV | 91 | 606 | ankyrin repeat protein                     | Q9J5H7 | V024 | 52 | Q6VZV5     | CNPV042 | 76 |
| 283 | 270089:271<br>426 (445) | QRI42758.1         | 618  | ChePV | 79 | 430 | ankyrin repeat protein                     | Q9J5H8 | V023 | 57 | Q6VZV6     | CNPV041 | 73 |
| 284 | 271494:273<br>266 (590) | QRI42757.1         | 858  | ChePV | 78 | 591 | ankyrin repeat protein                     | Q9J5H9 | V022 | 34 | Q6VZV7     | CNPV040 | 68 |
| 285 | 273297:274<br>280 (327) | QRM15315.1         | 477  | MLPV  | 80 | 327 | G protein-coupled<br>receptor-like protein | Q9J5I0 | V021 | 45 | Q6VZV8     | CNPV039 | 72 |
| 286 | 274389:275<br>624 (411) | QRM15314.1         | 594  | MLPV  | 78 | 413 | vaccinia HT Motif -like<br>protein         | P14361 | V006 | 32 | Q6VZV9     | CNPV038 | 62 |
| 287 | 275629:276<br>168 (179) | QRI42754.1         | 315  | ChePV | 88 | 179 | Uncharacterized protein                    |        |      |    | Q6VZW<br>0 | CNPV037 | 64 |
| 288 | 276225:276<br>509 (94)  | ARF02643.1         | 93.6 | SWPV  | 59 | 88  | FLYWCH-type<br>domain-containing protein   | Q9J5I2 | V019 | 29 | Q6VZW<br>1 | CNPV036 | 55 |
| 289 | 276765:278<br>789 (674) | QRI42751.1         | 1120 | ChePV | 82 | 664 | ankyrin repeat protein                     | Q9J5I3 | V018 | 43 | Q6VZW<br>3 | CNPV034 | 74 |

|     |                         |             |     |       |    |     |                                                         |        |       |    |            |         |    |
|-----|-------------------------|-------------|-----|-------|----|-----|---------------------------------------------------------|--------|-------|----|------------|---------|----|
| 290 | 278845:279<br>567 (240) | ARF02642.1  | 291 | SWPV  | 60 | 238 | V-type Ig domain                                        | Q9J5I4 | V017  | 51 | Q6VZW<br>4 | CNPV033 | 50 |
| 291 | 279684:280<br>385 (233) | ARF02641.1  | 334 | SWPV  | 67 | 243 | Ig-like domain putative<br>IFN-gamma binding<br>protein | Q9J5I5 | V016  | 36 | Q6VZW<br>5 | CNPV032 | 53 |
| 292 | 280801:281<br>163 (120) | ARF02639.1  | 150 | SWPV  | 62 | 120 | Uncharacterized protein                                 |        |       |    | Q6VZW<br>6 | CNPV031 | 60 |
| 293 | 281239:282<br>459 (406) | QRM15306.1  | 479 | MLPV  | 76 | 336 | ankyrin repeat protein                                  | Q9J5I9 | V012  | 46 | Q6VZW<br>7 | CNPV030 | 70 |
| 294 | 282497:282<br>922 (141) | QRI42746.1  | 245 | ChePV | 84 | 141 | C-type lectin-like protein                              |        |       |    | Q6VZW<br>8 | CNPV029 | 64 |
| 295 | 283040:284<br>260 (406) | ARF02636.1  | 484 | SWPV  | 65 | 408 | ankyrin repeat protein                                  | P14360 | V240  | 33 | Q6VZW<br>9 | CNPV028 | 55 |
| 296 | 284361:284<br>654 (97)  | QRM15303.1  | 140 | MLPV  | 91 | 626 | ankyrin repeat protein                                  |        |       |    | Q6VZX0     | CNPV027 | 49 |
| 297 | 284677:285<br>834 (385) | QRI42743.1  | 451 | ChePV | 66 | 381 | ankyrin repeat protein                                  | Q9J4Z4 | V246  | 31 | Q6VZX1     | CNPV026 | 52 |
| 298 | 285921:286<br>841 (306) | QRM15301.1  | 456 | MLPV  | 81 | 300 | alpha-SNAP-like protein                                 | Q9J5J0 | V011  | 57 | Q6VZX2     | CNPV025 | 65 |
| 299 | 286911:288<br>482 (523) | ARF02632.1  | 615 | SWPV  | 65 | 530 | ankyrin repeat protein                                  | Q9J4Z4 | V246  | 32 | Q6VZ37     | CNPV310 | 35 |
| 300 | 288594:289<br>166 (190) | ARE67579.1  | 280 | SWPV  | 72 | 190 | ankyrin repeat protein                                  | O90760 | V031  | 31 | Q6VZ38     | CNPV309 | 34 |
| 301 | 289286:290<br>356 (356) | QRI42739.1  | 554 | ChePV | 79 | 358 | serpin-like protein                                     | Q9J5J1 | V010  | 65 | Q6VZX5     | CNPV022 | 71 |
| 302 | 290412:291<br>986 (524) | QRI42738.1  | 887 | ChePV | 87 | 535 | ankyrin repeat protein                                  | Q9J4Z4 | V246  | 35 | Q6VZX6     | CNPV021 | 68 |
| 303 | 292035:293<br>414 (459) | ARE67577.1  | 563 | SWPV  | 59 | 483 | Ig-like domain protein                                  | Q9J5I4 | V017  | 28 | Q6VZ27     | CNPV320 | 33 |
| 304 | 293445:295              | YP_00904625 | 549 | PIPV  | 47 | 680 | ankyrin repeat protein                                  | Q9J4Z6 | V244_ | 34 | Q6VZY8     | CNPV009 | 32 |

|     |                         |            |     |       |    |     |                                 |        |      |    |        |         |    |
|-----|-------------------------|------------|-----|-------|----|-----|---------------------------------|--------|------|----|--------|---------|----|
|     | 538 (697)               |            | 0.1 |       |    |     |                                 |        |      |    |        |         |    |
| 305 | 295555:296<br>805 (416) | QRM15296.1 | 672 | MLPV  | 82 | 419 | ankyrin repeat protein          | Q9J4Z5 | V245 | 48 | Q6VZX7 | CNPV020 | 61 |
| 306 | 296974:298<br>299 (441) | QRI42736.1 | 668 | ChePV | 76 | 436 | ankyrin repeat protein          | Q9J5I7 | V014 | 53 | Q6VZX8 | CNPV019 | 64 |
| 307 | 298443:299<br>897 (484) | QRI42734.1 | 709 | ChePV | 81 | 479 | ankyrin repeat protein          | Q9J5G9 | V034 | 34 | Q6VZY0 | CNPV017 | 70 |
| 308 | 300021:300<br>584 (187) | QRI42733.1 | 194 | ChePV | 67 | 168 | C-type lectin protein           | P14370 | V008 | 47 | Q6VZY1 | CNPV016 | 58 |
| 309 | 300883:301<br>035 (50)  |            |     |       |    |     |                                 |        |      |    |        |         |    |
| 310 | 301567:303<br>408 (613) | ARF02862.1 | 694 | SWPV  | 74 | 480 | Putative ankyrin repeat protein | Q70GZ8 | V162 | 37 | Q6VZC4 | CNPV223 | 31 |
| 311 | 303583:304<br>992 (469) | QRI43039.1 | 685 | ChePV | 78 | 485 | V-type Ig domain                | Q9J5I4 | V017 | 34 | Q6VZ27 | CNPV320 | 76 |
| 312 | 305257:306<br>699 (480) | ARF02652.1 | 164 | SWPV  | 31 | 452 | ankyrin repeat protein          | Q9J5I7 | V014 | 28 | Q6VZ51 | CNPV296 | 28 |
| 313 | 306987:308<br>822 (611) | ARE67225.1 | 770 | SWPV  | 65 | 586 | ankyrin repeat protein          | Q9J4Z4 | V246 | 48 | Q6VZY6 | CNPV011 | 65 |

<sup>1</sup> aa, amino acid.

<sup>2</sup> Best-matching, significant non-FWPV protein sequence from BlastP analysis of GenBank database.

<sup>3</sup> AN, Accession numbers are from the GenBank or SwissProt database.

<sup>4</sup> BlastP score.

<sup>5</sup> %ID, % identity, percent amino acid identity.

<sup>6</sup> Function was deduced either from the degree of amino acid similarity to known genes or by the presence of Prosite signatures.

<sup>7</sup> Best-matching ORF from the FWPV challenge strain.

<sup>8</sup> Best-matching ORF from the CNPV strain.

\*Represents conserved gene of avipoxvirus

CNPV, Canarypox virus; SWPV, Shearwaterpox virus; PEPV, Penguinpox virus; PIPV, Pigeonpox virus; FGPV, Flamingopox virus; TKPV, Turkeypox virus; MLPV, Mudlarkpox virus; MPPV, Magpiepox virus; ChePV, Cheloniid poxvirus
